# Supplementary material for: SIRT1 protects against emphysema via FOXO3-mediated reduction of premature senescence in mice
Source: JCI journal article supplement (doi:10.1172/jci60132), 2012-05-01

# **SIRT1 protects against emphysema via FOXO3-mediated reduction of premature senescence in mice**

Hongwei Yao,<sup>1</sup> Sangwoon Chung,<sup>1</sup> Jae-woong Hwang,<sup>1</sup> Saravanan Rajendrasozhan,<sup>1</sup> Isaac K. Sundar,<sup>1</sup> David A. Dean,<sup>2</sup> Michael W. McBurney,<sup>3</sup> Leonard Guarente,<sup>4</sup> Wei Gu,<sup>5</sup> Mikko Rönty,<sup>6</sup> Vuokko L. Kinnula,<sup>6</sup> and Irfan Rahman<sup>1</sup>

<sup>1</sup>Department of Environmental Medicine, Lung Biology and Disease Program, and <sup>2</sup>Department of Pediatrics, University of Rochester Medical Center, Rochester, New York, USA. <sup>3</sup>Center for Cancer Therapeutics, Ottawa Hospital Research Institute, Ottawa, Ontario, Canada. <sup>4</sup>Department of Biology, Massachusetts Institute of Technology, Cambridge, Massachusetts, USA. <sup>5</sup>Institute of Cancer Genetics and Department of Pathology, College of Physician and Surgeons, Columbia University, New York, New York, USA. <sup>6</sup>Departments of Pathology and Medicine, University of Helsinki and Helsinki University Central Hospital, Helsinki, Finland.

## Supplemental Figure Legends

**Supplemental Figure 1. Lung level of SIRT1 is decreased in mice exposed to CS and elastase, as well as in *Sirt1*<sup>+/-</sup> mice, whereas the level of SIRT1 is increased in *Sirt1* Tg mice.**

The level of SIRT1 was determined by immunoblotting in mouse lung. (A and B) SIRT1 level was significantly reduced in WT mouse lung after 3 d and 6 mo CS exposures (A) as well as after elastase administration (B). (C) Lung SIRT1 protein level was significantly decreased in *Sirt1*<sup>+/-</sup> mice, but augmented in *Sirt1* Tg mice as compared to their WT littermates. Sal: saline; Ela: elastase. Gel pictures shown are representative of at least 3 separate mice. Band density was expressed as fold change relative to corresponding  $\beta$ -actin. \*\* $P<0.01$ , \*\*\* $P<0.001$ , significant compared with the corresponding air- or saline-exposed mice; ++ $P<0.01$ , +++ $P<0.001$ , significant compared with WT mice.

**Supplemental Figure 2. Spontaneous airspace enlargement occurs in *Sirt1*<sup>+/-</sup> mice at the age of 1 yr, and an age-dependent decrease of SIRT1 can be seen in mouse lung.** (A and B) No significant alteration in Lm of airspace was observed in *Sirt1*<sup>+/-</sup> mice until the age of 1 yr. (C) Lung SIRT1 level was decreased in an age-dependent manner. H&E-stained pictures represent three separate mice. Original magnification,  $\times 100$ . Scale bar: 100  $\mu$ m. Band density was expressed as fold change relative to corresponding  $\beta$ -actin. Data are shown as mean  $\pm$  SEM (n=3 per group). The gel pictures shown are representative of at least 2 separate mice. \* $P<0.05$ , \*\* $P<0.01$ , significant compared with 4 mo old mice.

**Supplemental Figure 3. SIRT1 prevents decline in lung function, impairment of exercise capacity, and reduction in arterial oxygen saturation in emphysematous mice.** (A and B)  $R_L$

was significantly decreased in *Sirt1*<sup>+/-</sup> mice (**A**), whereas no alteration of R<sub>L</sub> was seen in WT or *Sirt1* Tg (**B**) mice exposed to CS for 6 mo. (**C** and **D**) There was no significant change of Rn among *Sirt1*<sup>+/-</sup>, *Sirt1* Tg, and WT mice exposed to CS for 6 mo. (**E-H**) Deficiency of *Sirt1* decreased treadmill running time (**E**) and running distance (**F**), whereas no change in run time (**G**) or distance (**H**) was observed in *Sirt1* Tg mice exposed to CS for 6 mo. (**I** and **J**) Elastase injection significantly decreased R<sub>L</sub> (**I**) and arterial oxygen saturation (**J**) in WT mice, which were aggravated in *Sirt1*<sup>+/-</sup> mice. (**K**) No alteration of Rn was observed between *Sirt1*<sup>+/-</sup> mice and WT littermates after intratracheal elastase injection. Sal: saline; Ela: elastase. Data are shown as mean ± SEM (n=3 to 4 per group). \**P*<0.05, \*\**P*<0.01, \*\*\**P*<0.001, significant compared with the corresponding air- or saline-exposed groups; +*P*<0.05, significant compared with the corresponding WT mice.

**Supplemental Figure 4. SRT1720 attenuates elastase-induced reduction in R<sub>L</sub> and arterial oxygen saturation associated with increased SIRT1 activity.** (**A** and **B**) Treatment with SRT1720 (50-100 mg/kg) before the development of emphysema attenuated elastase-induced reduction in R<sub>L</sub> (**A**) and arterial oxygen saturation (**B**) in WT mice. (**C** and **D**) SRT1720 administration (100 mg/kg) before the development of emphysema did not exhibit any effect on R<sub>L</sub> (**C**) or arterial oxygen saturation (**D**) in *Sirt1*<sup>+/-</sup> mice. (**E**) SIRT1 activity in lungs was significantly increased in WT, but not in *Sirt1*<sup>+/-</sup> mice, after SRT1720 (100 mg/kg) treatment before the development of emphysema. (**F** and **G**) SRT1720 administration (100 mg/kg) after the development of emphysema improved the reduced R<sub>L</sub> (**F**) and arterial oxygen saturation (**G**) in WT, but not in *Sirt1*<sup>+/-</sup> mice. Sal: saline; Ela: elastase; Veh: vehicle; SRT: SRT1720. Data are shown as mean ± SEM (n=3 to 4 per group). \*\**P*<0.01, \*\*\**P*<0.001, significant compared with

corresponding saline-exposed groups; <sup>+</sup>*P*<0.05, <sup>++</sup>*P*<0.01, <sup>+++</sup>*P*<0.001, significant compared with corresponding Veh-treated mice; <sup>†</sup>*P*<0.05, significant compared with WT mice.

**Supplemental Figure 5. CS exposure decreases SIRT1 level in BAL cells and lung epithelial cells, as well as the confirmation of airway epithelium- and myeloid cell-specific deficiency of *Sirt1* in mice.** (A and B) CS exposure for 6 mo significantly reduced the level of SIRT1 in BAL cells (A) and in lungs (B) of 129/SvJ mice. (C) There was no expression of SIRT1 in BAL cells (predominantly macrophages) from Mac-*Sirt1*<sup>-/-</sup> mice as compared to WT control. (D) The level of SIRT1 was abolished in BAL cells from Mac-*Sirt1*<sup>-/-</sup> mice. (E) SIRT1 expression was not seen in airway epithelium of Epi-*Sirt1*<sup>-/-</sup> mice as compared to WT control. (F and G) The expression of SIRT1 in CC10-positive cells was not observed in lungs (F) and isolated Clara cells (G) from Epi-*Sirt1*<sup>-/-</sup> mice. Scale bar: 50 μm. Band density was expressed as fold change relative to corresponding β-actin. Data are shown as mean ± SEM (n=3 per group). \*\*\**P*<0.001, significant compared with air-exposed or WT mice.

**Supplemental Figure 6: Elastase-induced decrease in exercise capacity and arterial oxygen saturation are aggravated in mice deficient of *Sirt1* in airway epithelium, but not in myeloid cells.** (A) Elastase-induced reduction of treadmill run time was decreased in Epi-*Sirt1*<sup>-/-</sup> mice as compared to WT littermates. (B) *Sirt1* deficiency in airway epithelium lowered the arterial oxygen saturation in response to intratracheal administration of elastase. (C) There was no change of Rn between Epi-*Sirt1*<sup>-/-</sup> mice and WT littermates exposed to elastase (D and E) Elastase-induced a decrease in treadmill running time (D) and arterial oxygen saturation (E) were not altered between Mac-*Sirt1*<sup>-/-</sup> mice and WT littermates in response to elastase administration. (F) No alteration in Rn was observed between Mac-*Sirt1*<sup>-/-</sup> mice and WT

littermates exposed to elastase. Sal: saline; Ela: elastase. Data are shown as mean  $\pm$  SEM (n=3 to 4 per group). \*\* $P$ <0.01, \*\*\* $P$ <0.001, significant compared with corresponding saline-treated groups; + $P$ <0.05, significant compared with corresponding WT littermates.

**Supplemental Figure 7. SIRT1 regulates CS-induced FOXO3 degradation and acetylation, and CS disrupts the interaction of SIRT1 with FOXO3 in mouse lung.** (A) CS exposure for 6 mo significantly reduced the level of FOXO3 in lungs of *Sirt1*<sup>+/-</sup> mice versus WT mice, which was attenuated by *Sirt1* overexpression. (B) Administration of SRT1720 attenuated FOXO3 reduction in mouse lung exposed to CS for 3 d. (C) SIRT1 protected against FOXO3 acetylation in mouse lung in response to 6 mo of CS exposure. (D) CS disrupted SIRT1 interaction with FOXO3 in mouse lung at both 3 d and 6 mo exposures. Gel pictures shown are representative of at least 3 separate mice. Band density was expressed as fold change relative to corresponding  $\beta$ -actin. \* $P$ <0.05, \*\*\* $P$ <0.001, significant compared with air-exposed mice; ++ $P$ <0.01, significant compared with WT littermates; †† $P$ <0.01, significant compared with Veh-treated mice.

**Supplemental Figure 8. SIRT1 level is decreased, whereas SA- $\beta$ -gal activity and p21 expression are increased in lungs of patients with COPD.** (A) The level of SIRT1 was decreased in lungs of patients with COPD as compared to non-smokers. Band density was expressed as fold change relative to corresponding  $\beta$ -actin. (B and C) The activity of SA- $\beta$ -gal was increased in lungs of patients with COPD as compared to non-smokers by both its quantitative assay (B) and staining (C). SA- $\beta$ -gal activity was expressed as observed fluorescence of 4-MU after normalization to protein content (mg) in its quantitative assay. (D) The p21 expression was increased in lungs of patients with COPD when compared to non-smokers by an immunohistochemical staining. Negative control denotes the staining without p21

antibody or X-gal. Original magnification,  $\times 400$ . Scale bar: 50  $\mu\text{m}$ . Data are shown as mean  $\pm$  SEM. \*\* $P < 0.01$ , \*\*\* $P < 0.001$ , significant compared with non-smokers.

**Supplemental Figure 9. SIRT1 decreases CS-induced RelA/p65 acetylation, and reduces CS- and elastase-mediated inflammatory cell influx in lungs.** (A) SIRT1 protected against 6 mo of CS-induced increase in RelA/p65 and its acetylation (on K310) in lung nuclear proteins. (B and C) Three days of CS exposure increased neutrophil influx in BAL fluid of *Sirt1*<sup>+/-</sup> mice (B) versus WT littermates, which was attenuated by *Sirt1* overexpression (C). (D and E) The number of total cells and macrophages in BAL fluid were increased in *Sirt1*<sup>+/-</sup> mice (D) as compared to WT littermates in response to 6 mo of CS exposure, which was significantly attenuated in *Sirt1* Tg mice (E). (F and G) The number of neutrophils in BAL fluid was increased in Epi-*Sirt1*<sup>+/-</sup> (D), but not in Mac-*Sirt1*<sup>+/-</sup> (E), mice as compared to their WT littermates exposed to CS for 3 d. (H) Deficiency of *Sirt1* further increased neutrophil influx in BAL fluid after elastase intratracheal injection. The gel pictures shown are representative of at least 3 separate mice. Sal: saline; Ela: elastase; Mac: macrophages. Data are shown as mean  $\pm$  SEM (n=3 to 4 per group). \* $P < 0.05$ , \*\* $P < 0.01$ , \*\*\* $P < 0.001$ , significant compared with the corresponding air- or saline-exposed groups; + $P < 0.05$ , ++ $P < 0.01$ , +++ $P < 0.001$ , significant compared with the corresponding WT littermates.

**Supplemental Figure 10. Treatment with SRT1720 and IKK2 inhibitor decrease CS- and elastase-mediated neutrophil influx in BAL fluid.** (A) Treatment with SRT1720 prior to CS exposure for 3 d attenuated neutrophil influx in BAL fluid of WT mice, but not in *Sirt1*<sup>+/-</sup> mice. (B) Neutrophil influx into BAL fluid was reduced by SRT1720 in WT mice, but not in *Sirt1*<sup>+/-</sup> mice, after elastase intratracheal injection. (C) Lung SIRT1 activity was significantly increased

in WT, but not in *Sirt1*<sup>+/-</sup>, mice after SRT1720 treatment in response to 3 d of CS exposure. **(D)** IKK2 inhibitor treatment prior to CS exposure for 3 d was more effective in attenuating the neutrophil influx in BAL fluid of *Sirt1*<sup>+/-</sup> mice as compared to WT mice. **(E)** *Sirt1*<sup>+/-</sup> mice were sensitive to IKK2 inhibition in reducing neutrophils in BAL fluid after elastase treatment. Sal: saline; Ela: elastase; Veh: vehicle; SRT: SRT1720; IKKi: IKK2 inhibitor. Data are shown as mean  $\pm$  SEM (n=3 to 4 per group). \*\*\* $P$ <0.001, significant compared with corresponding air- or saline-exposed groups;  $^{\dagger}P$ <0.05,  $^{\dagger\dagger}P$ <0.01,  $^{\dagger\dagger\dagger}P$ <0.001, significant compared with corresponding vehicle-treated groups.

**Supplemental Figure 1**

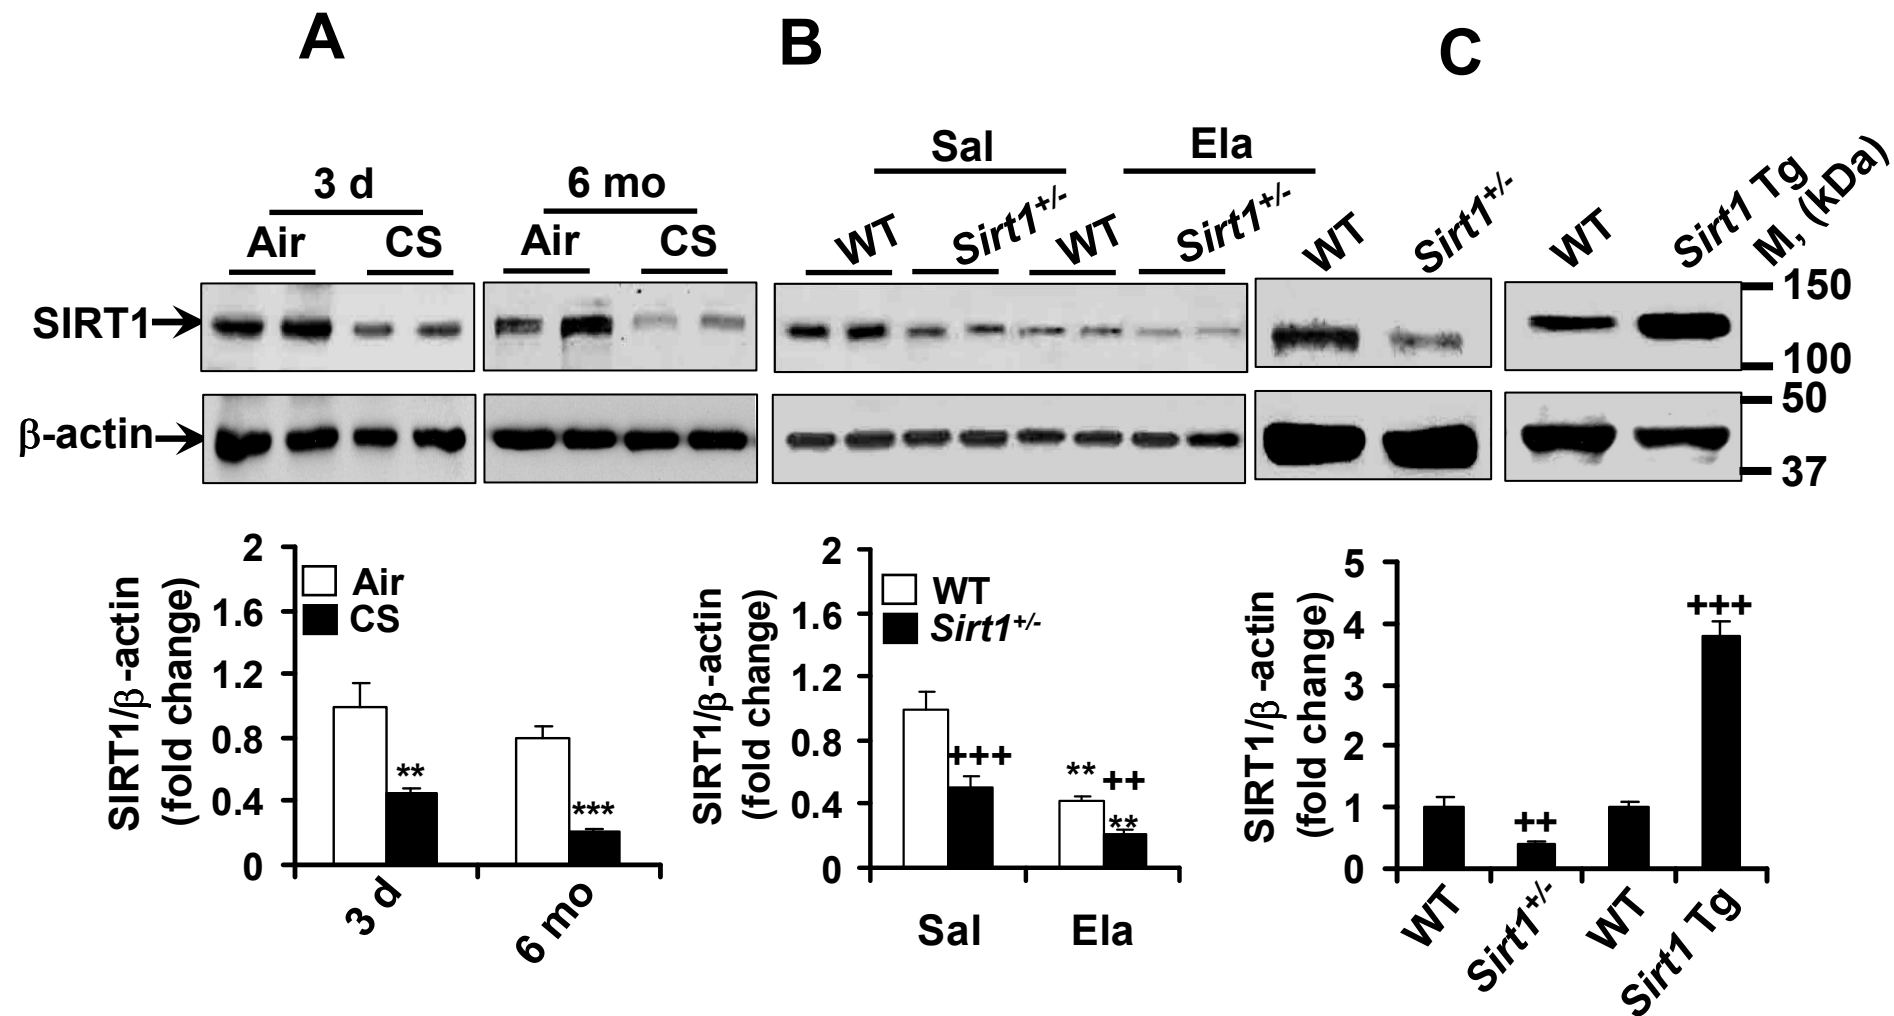



# Supplemental Figure 2

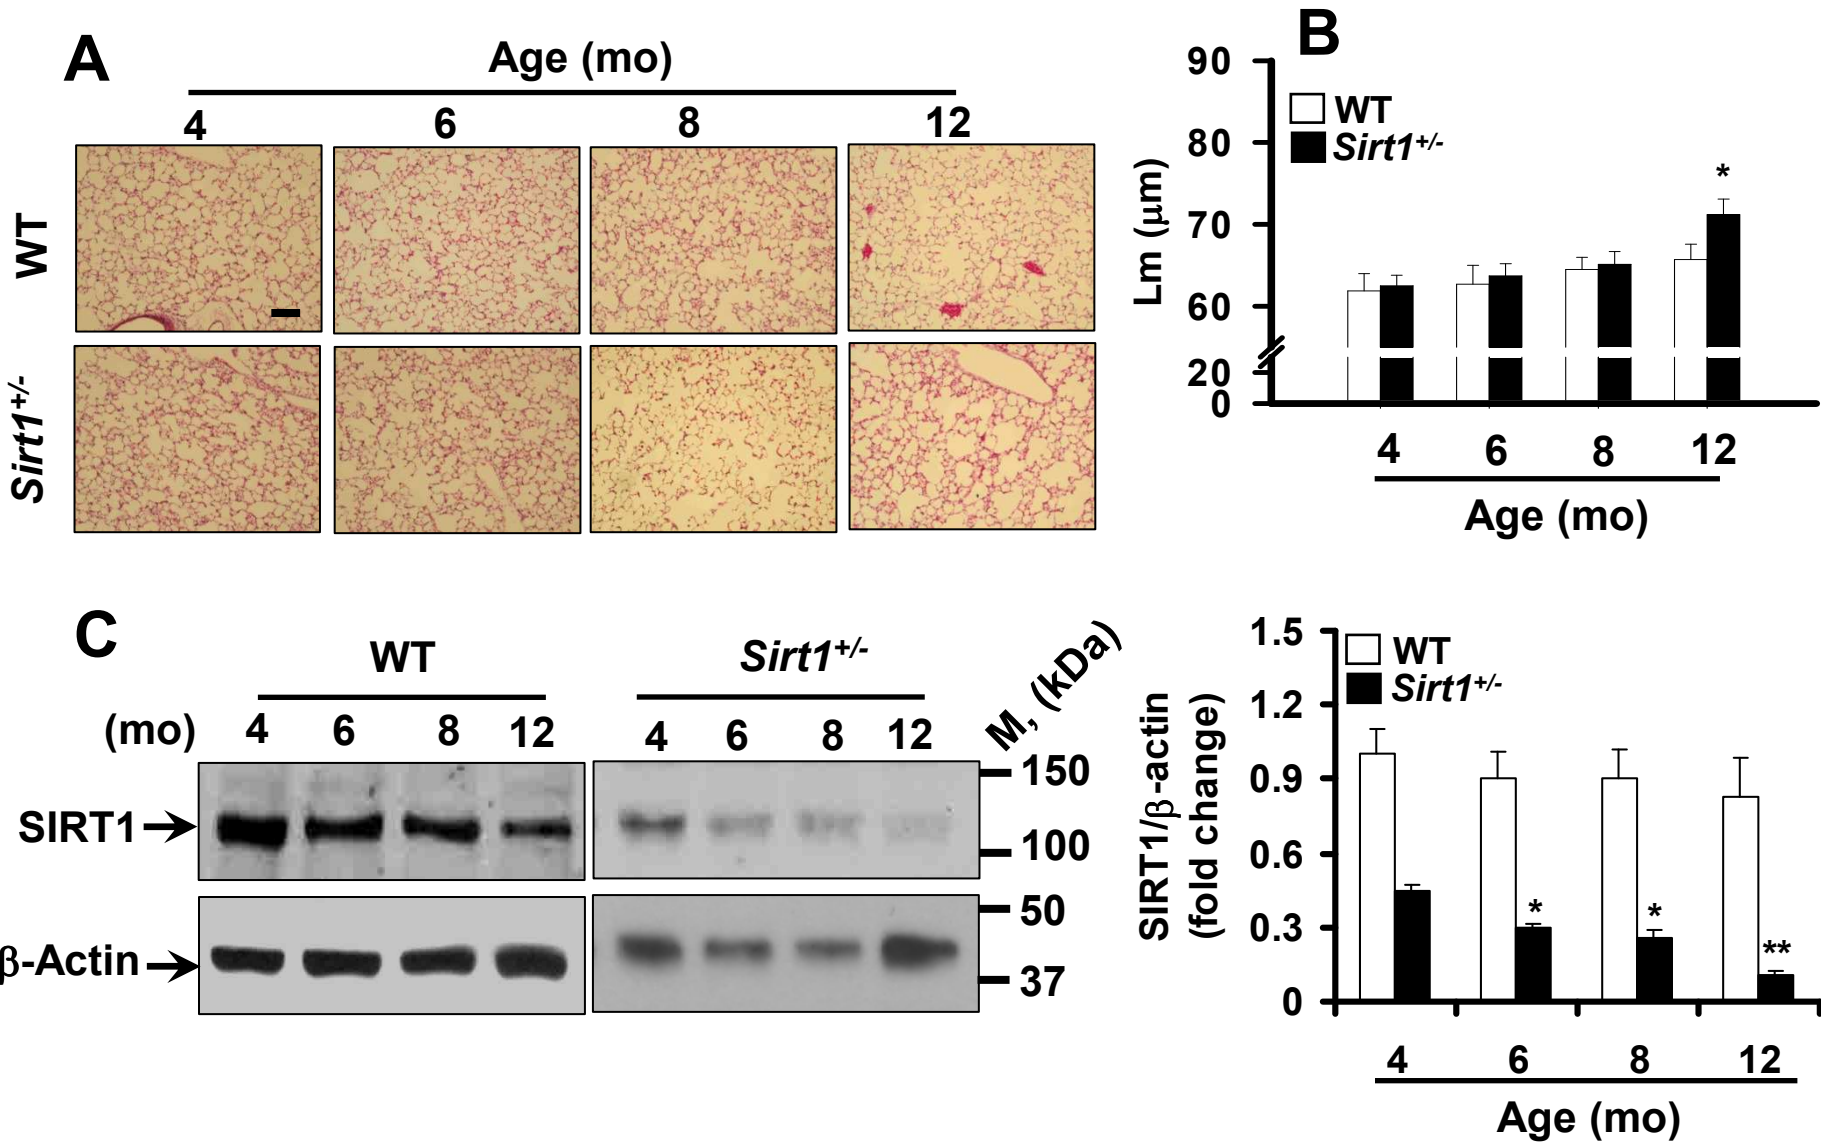

## Supplemental Figure 3

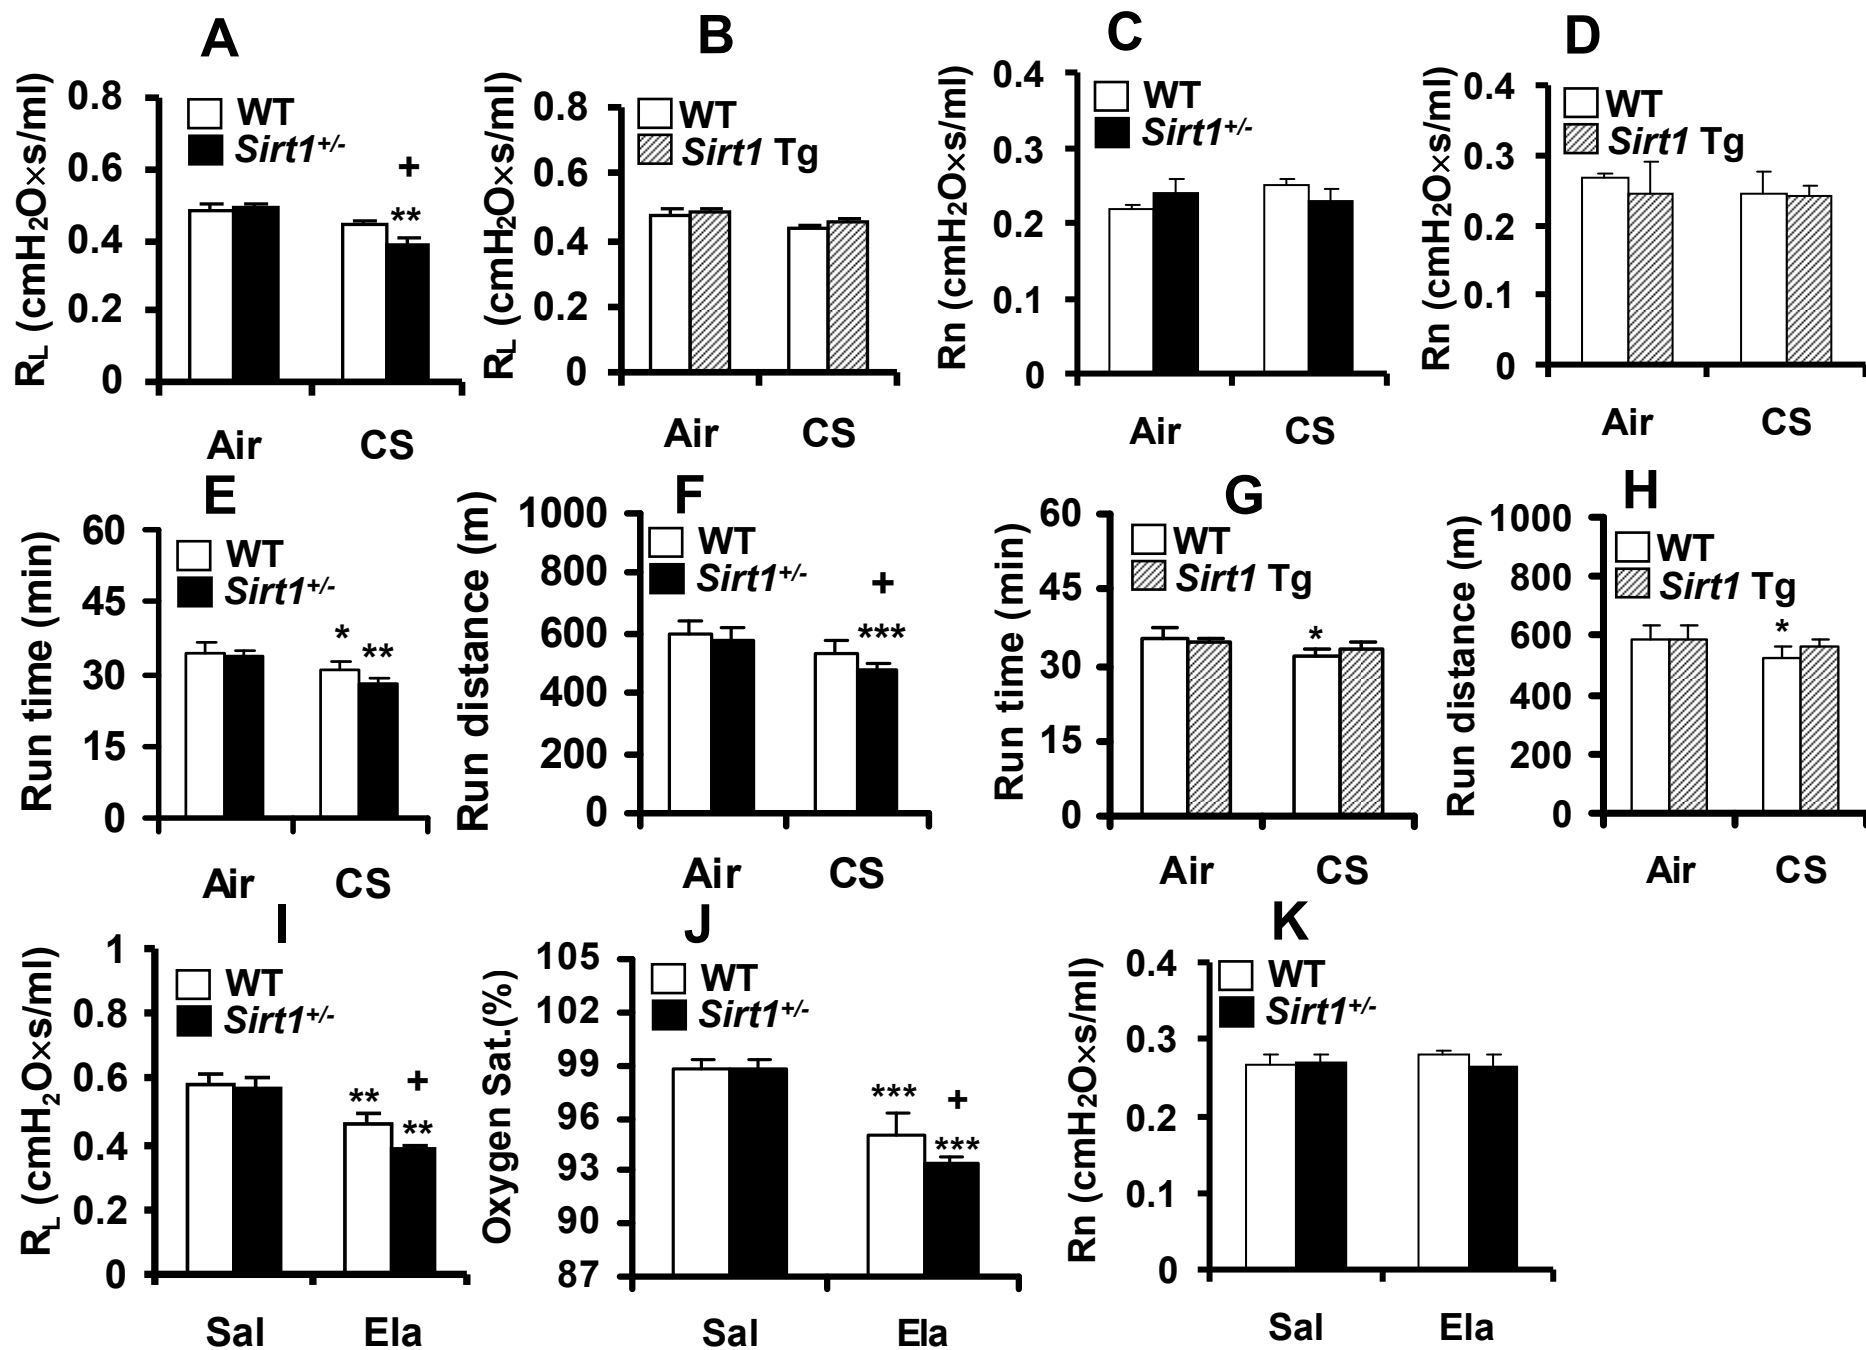

## Supplemental Figure 4

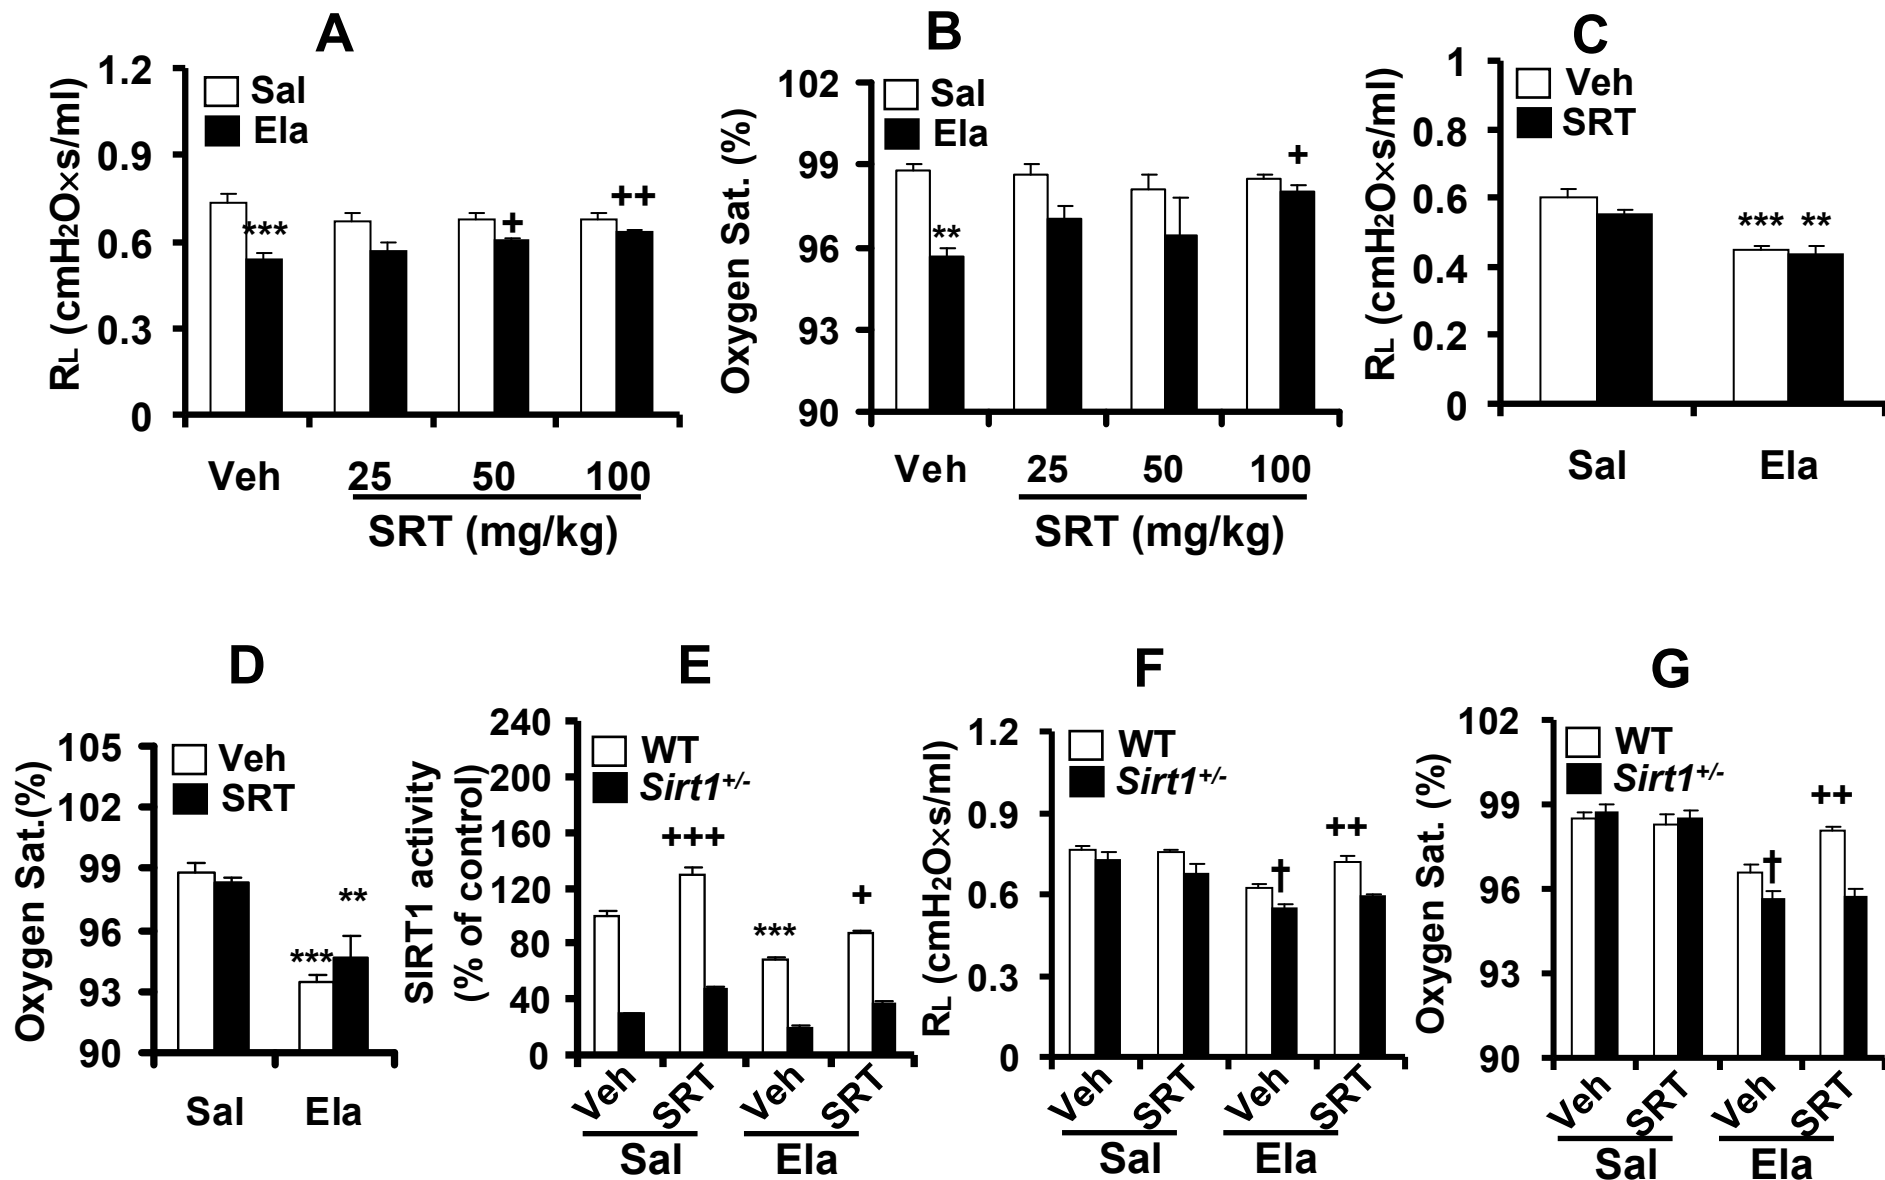

## Supplemental Figure 5

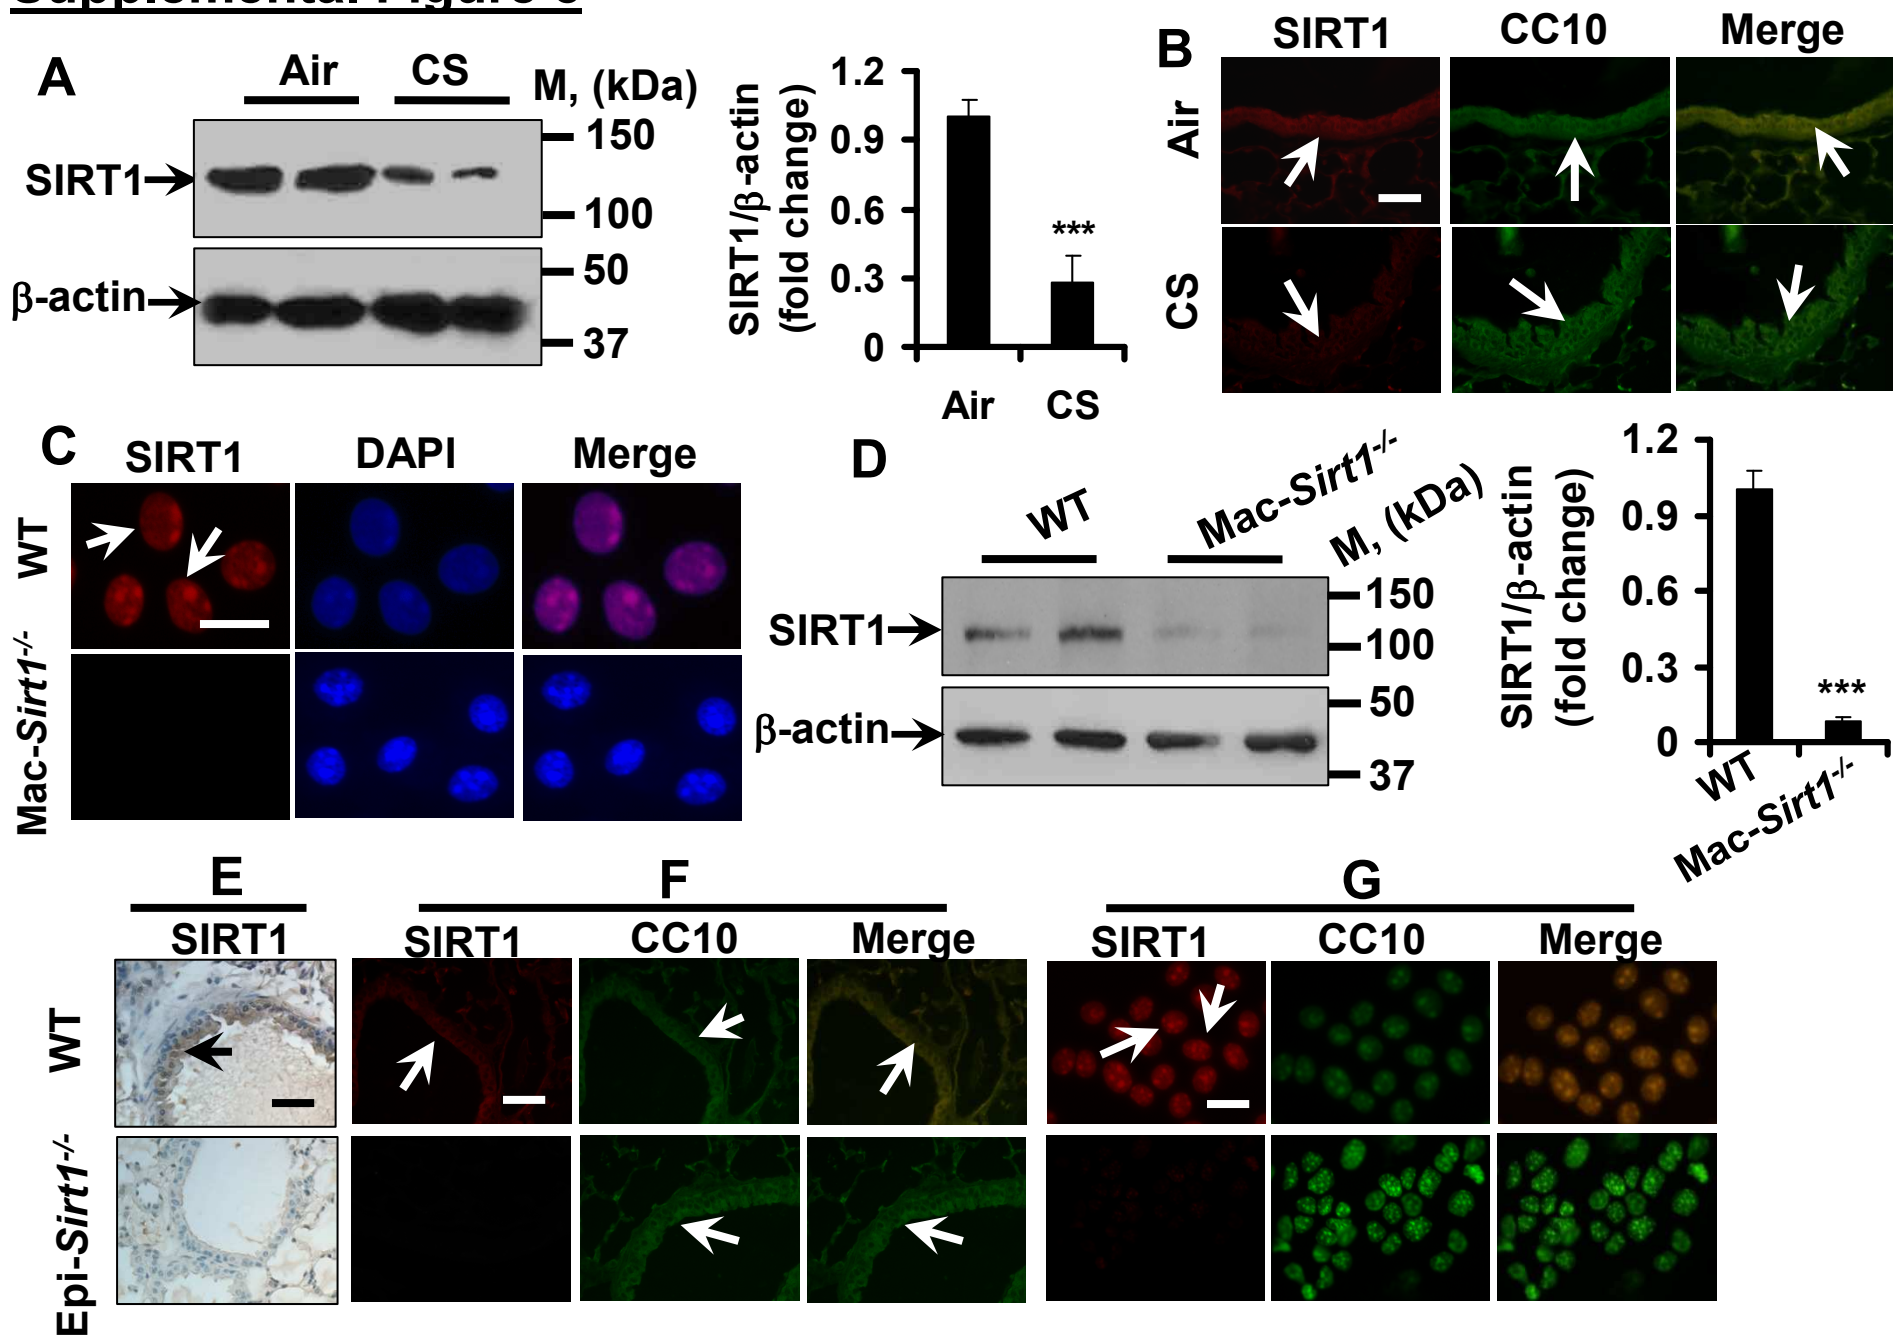

## Supplemental Figure 6

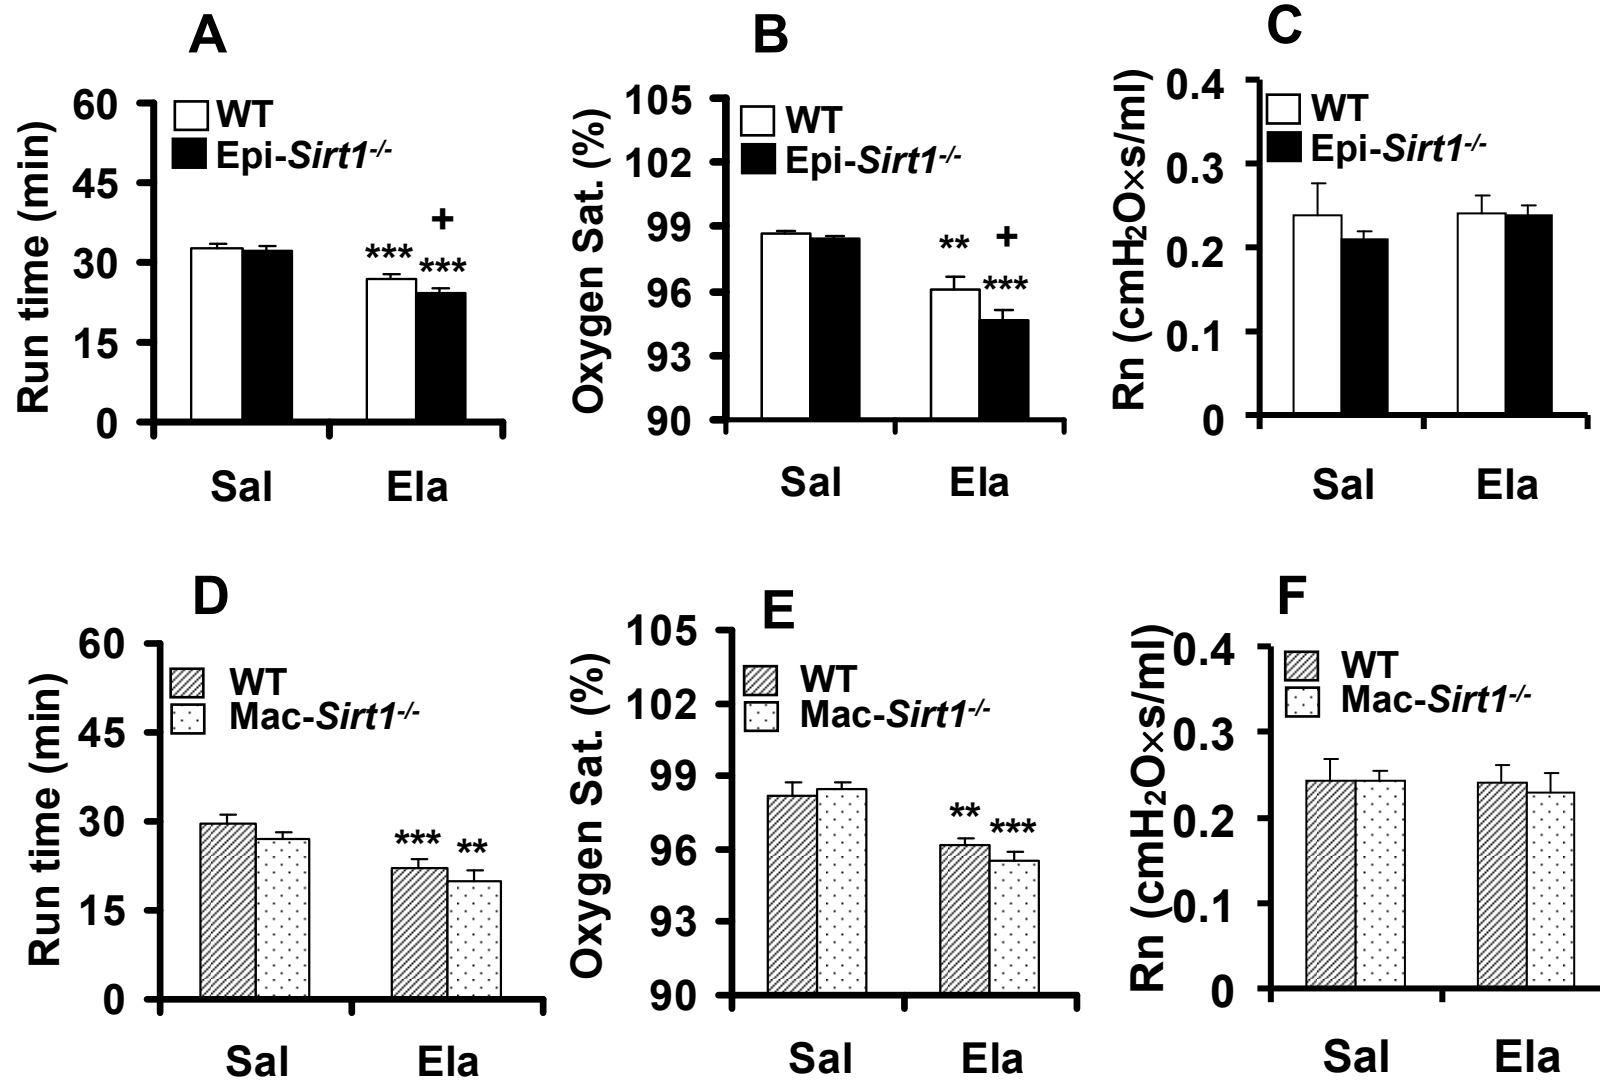

## Supplemental Figure 7

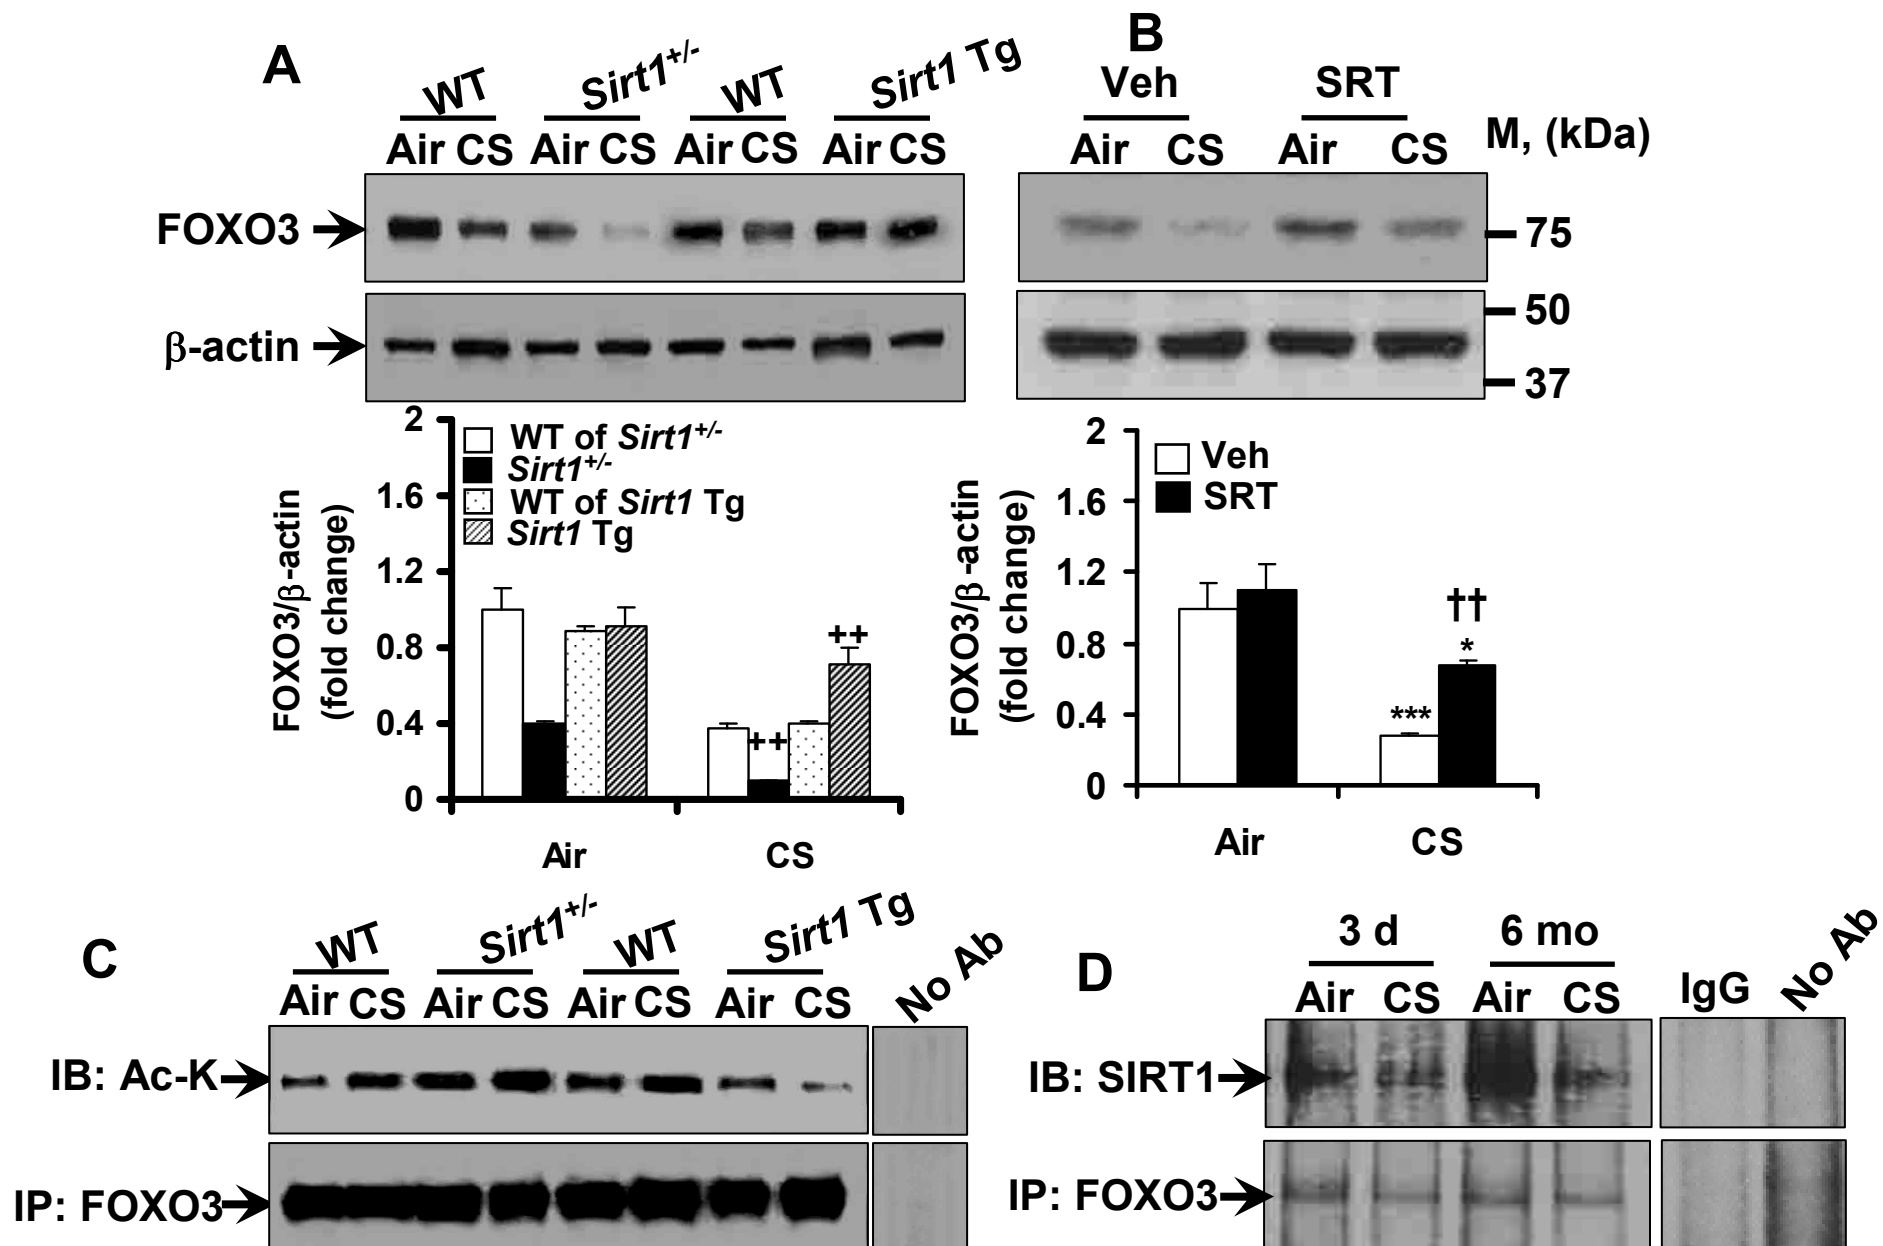

**Supplemental Figure 8**

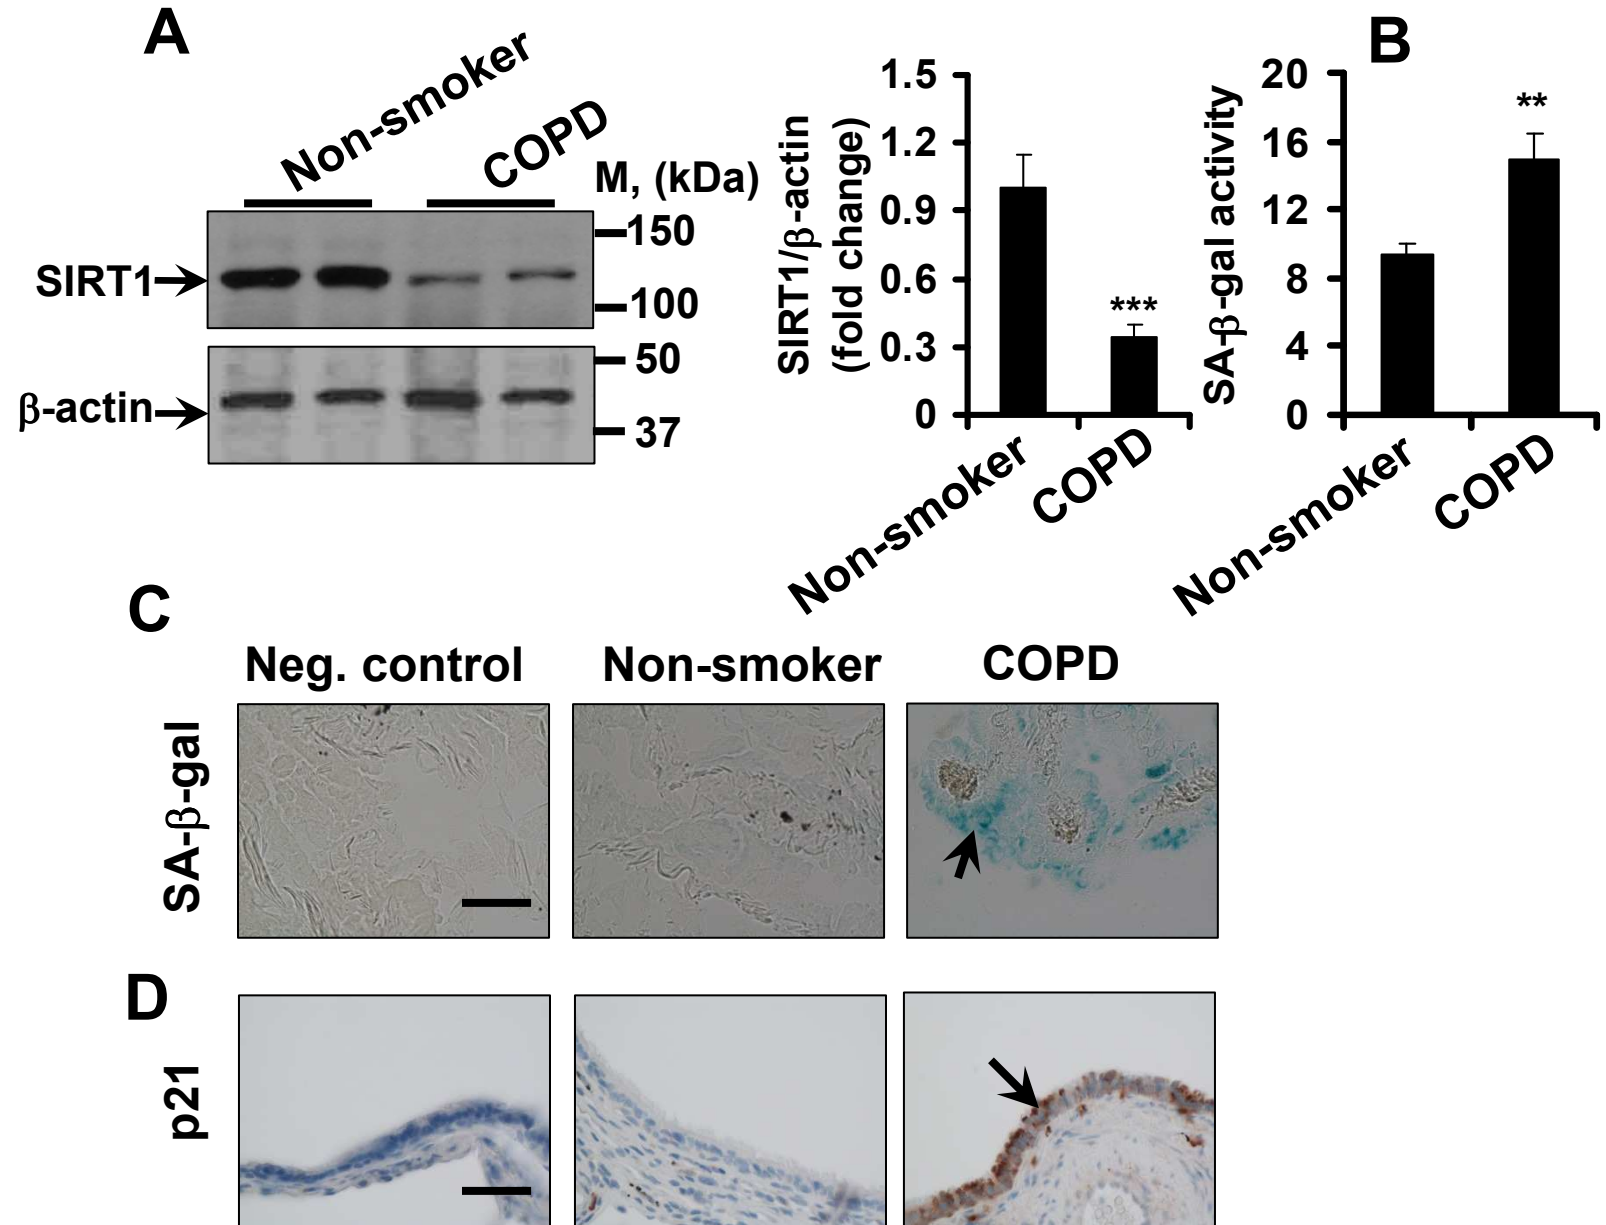

## Supplemental Figure 9

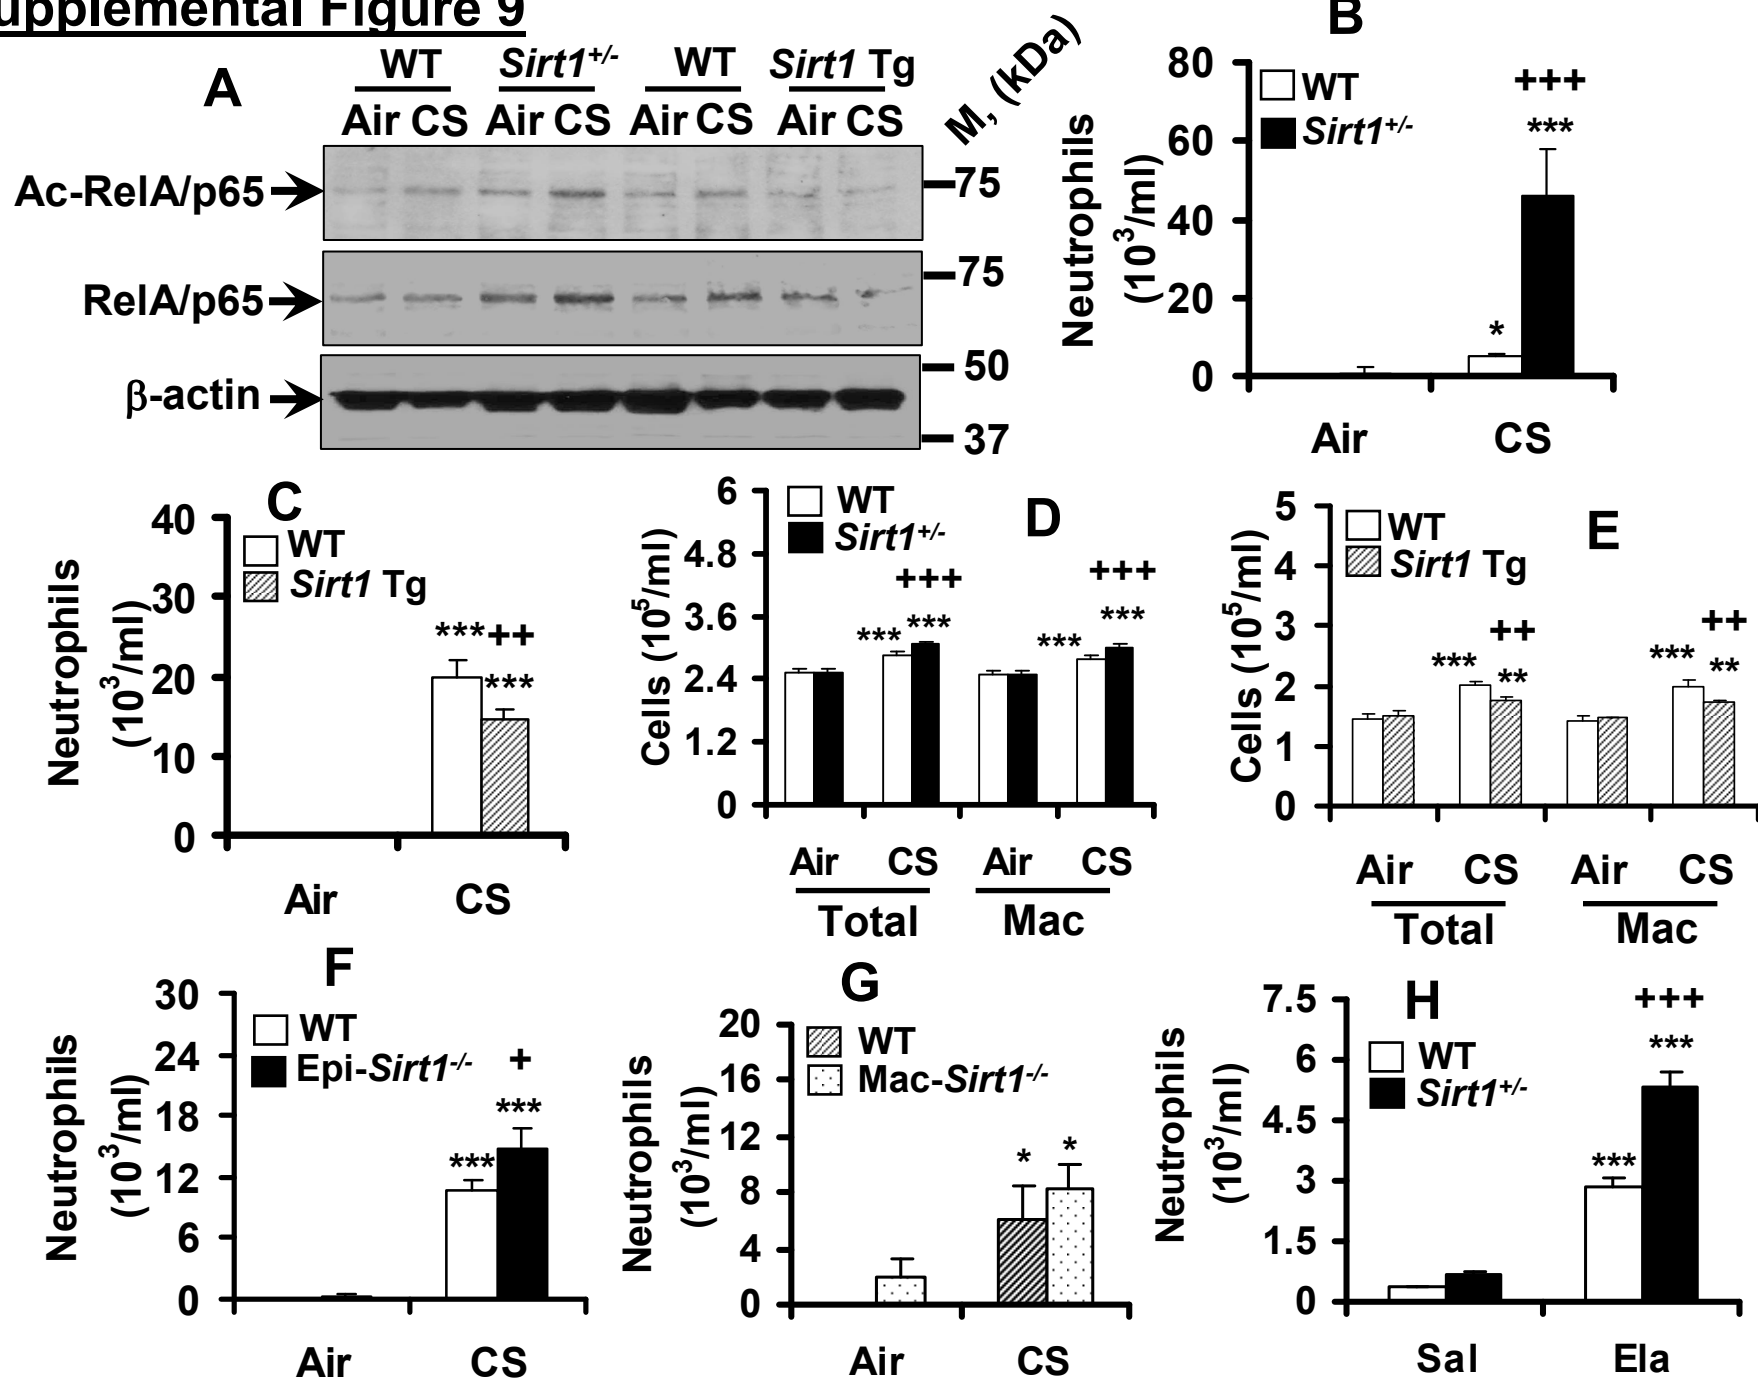



# Supplemental Figure 10

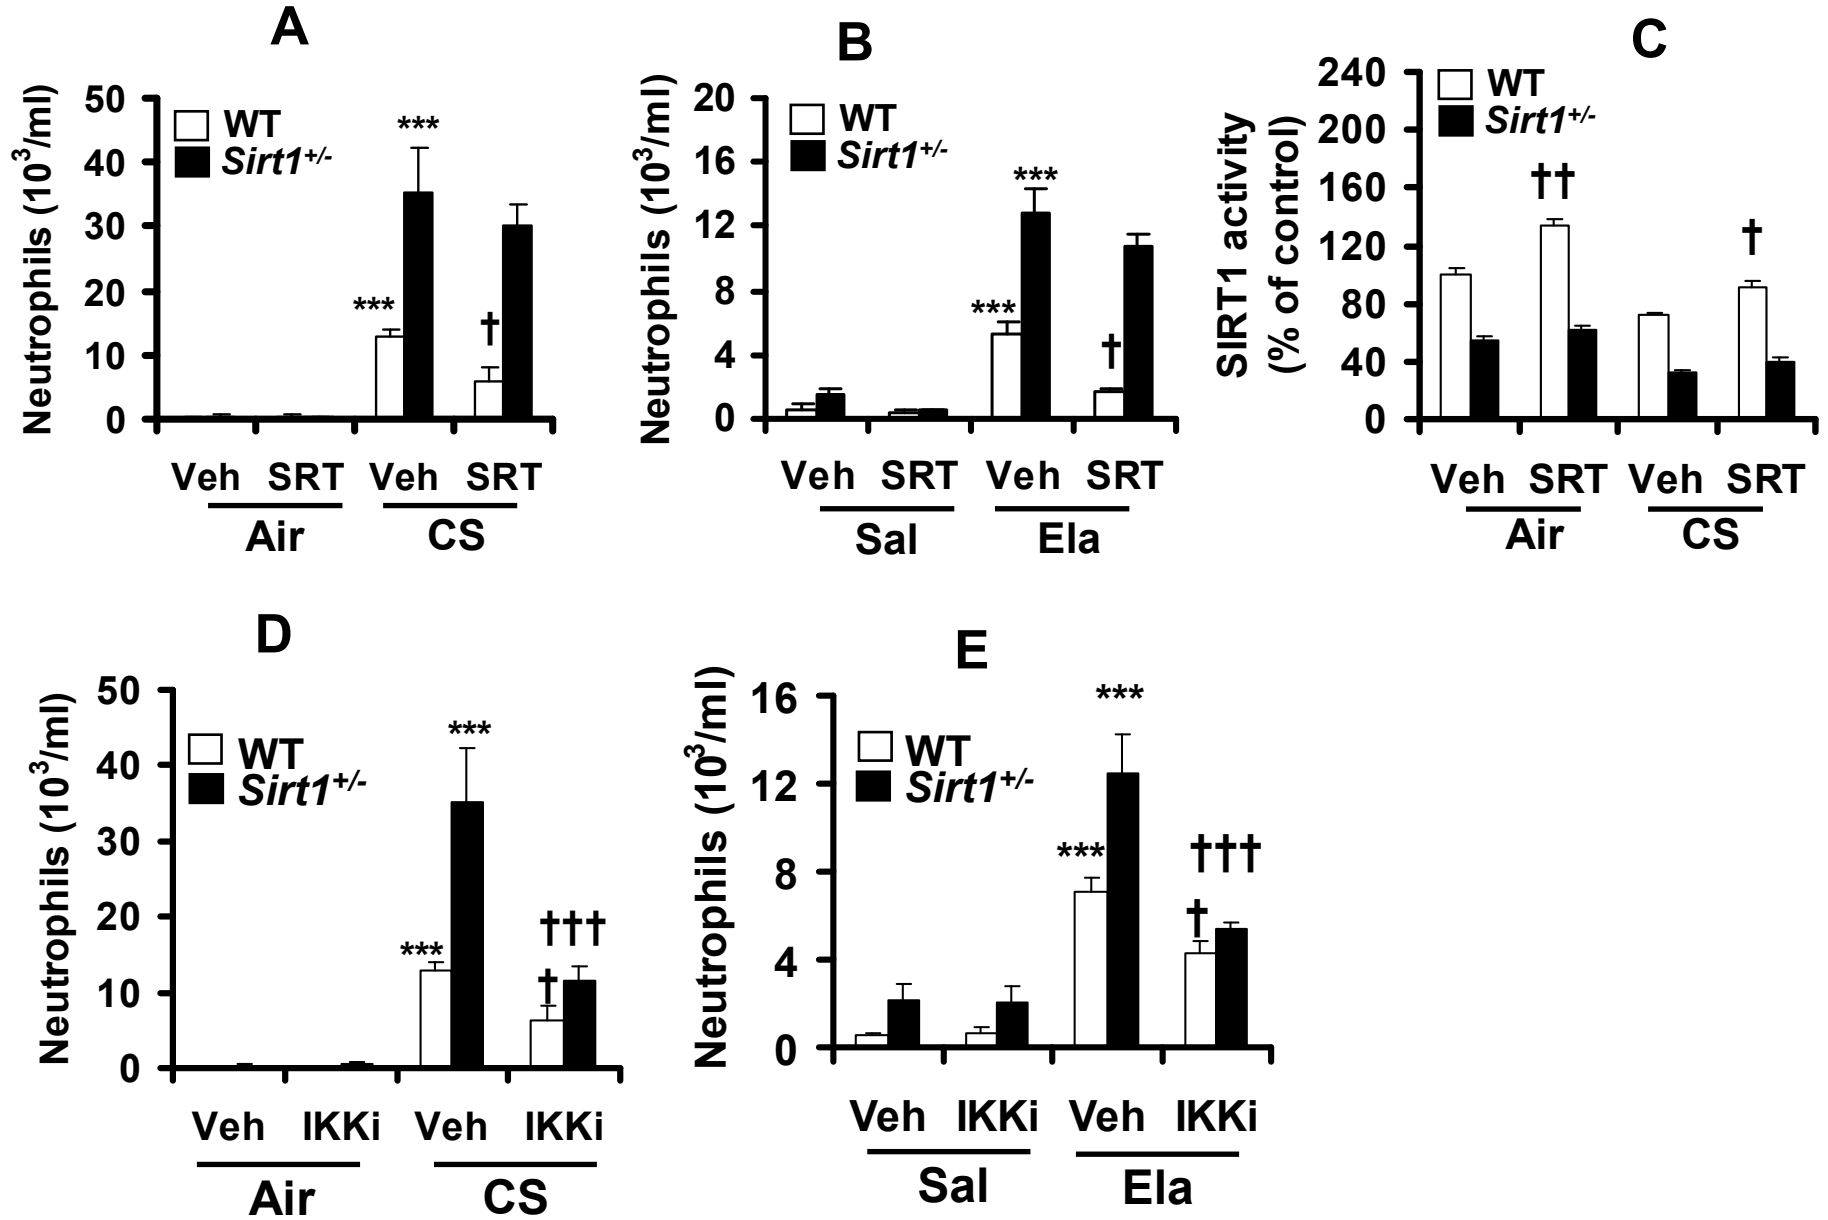

Supplement: sd1 [file 1]
